# Supplementary material for: Secreted multifunctional Glyceraldehyde-3-phosphate dehydrogenase sequesters lactoferrin and iron into cells via a non-canonical pathway
Source: PubMed Central journal article supplement (PMC4682080; doi:10.1038/srep18465), 2015-12-17
Supplement: srep18465-s1.pdf [file srep18465-s1.pdf]

## Supplementary Material

Secreted multifunctional Glyceraldehyde-3-phosphate dehydrogenase sequesters lactoferrin and iron into cells via a non-canonical pathway

Anoop S. Chauhan<sup>1, ‡</sup>, Pooja Rawat<sup>1, ‡</sup>, Himanshu Malhotra<sup>1</sup>, Navdeep Sheokand<sup>1</sup>, Manoj Kumar<sup>1</sup>, Anil Patidar<sup>1</sup>, Surbhi Chaudhary<sup>1</sup>, Priyanka Jakhar<sup>1</sup>, Chaaya I.Raje<sup>2</sup> and Manoj Raje<sup>1</sup>

<sup>1</sup> Institute of Microbial Technology, CSIR, Sector 39A, Chandigarh, INDIA-160036.

<sup>2</sup> National Institute of Pharmaceutical Education & Research, Phase X, Sector 67, SAS Nagar, Punjab, INDIA-160062.

<sup>‡</sup>Both these authors contributed equally to the manuscript.

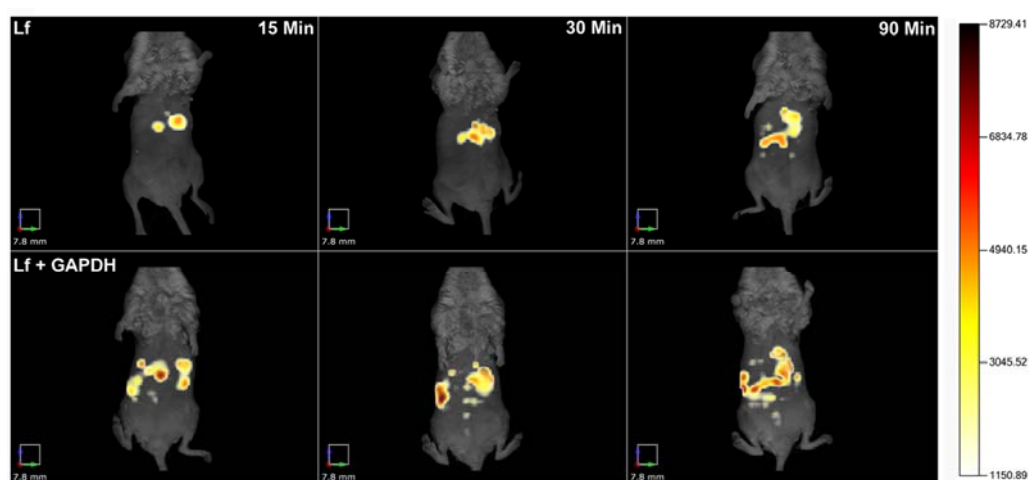

**Fig S1**

**Supplementary Figure S1. Lactoferrin uptake in orally fed mice is enhanced by sGAPDH.** GAPDH supplementation enhances intestinal absorption of Lf in mice, Overnight starved, 10-12 week old female Balb/c mice were orally fed with, either 500 $\mu$ g Alexa-647 labeled Lf (upper panel) alone or labeled Lf along with 1mg GAPDH (lower panel). After feeding, mice were imaged at 15, 30 and 90 min intervals in a Perkin Elmer FMT 2500LX *in vivo* imager. Results are representative of 3 independent experiments.

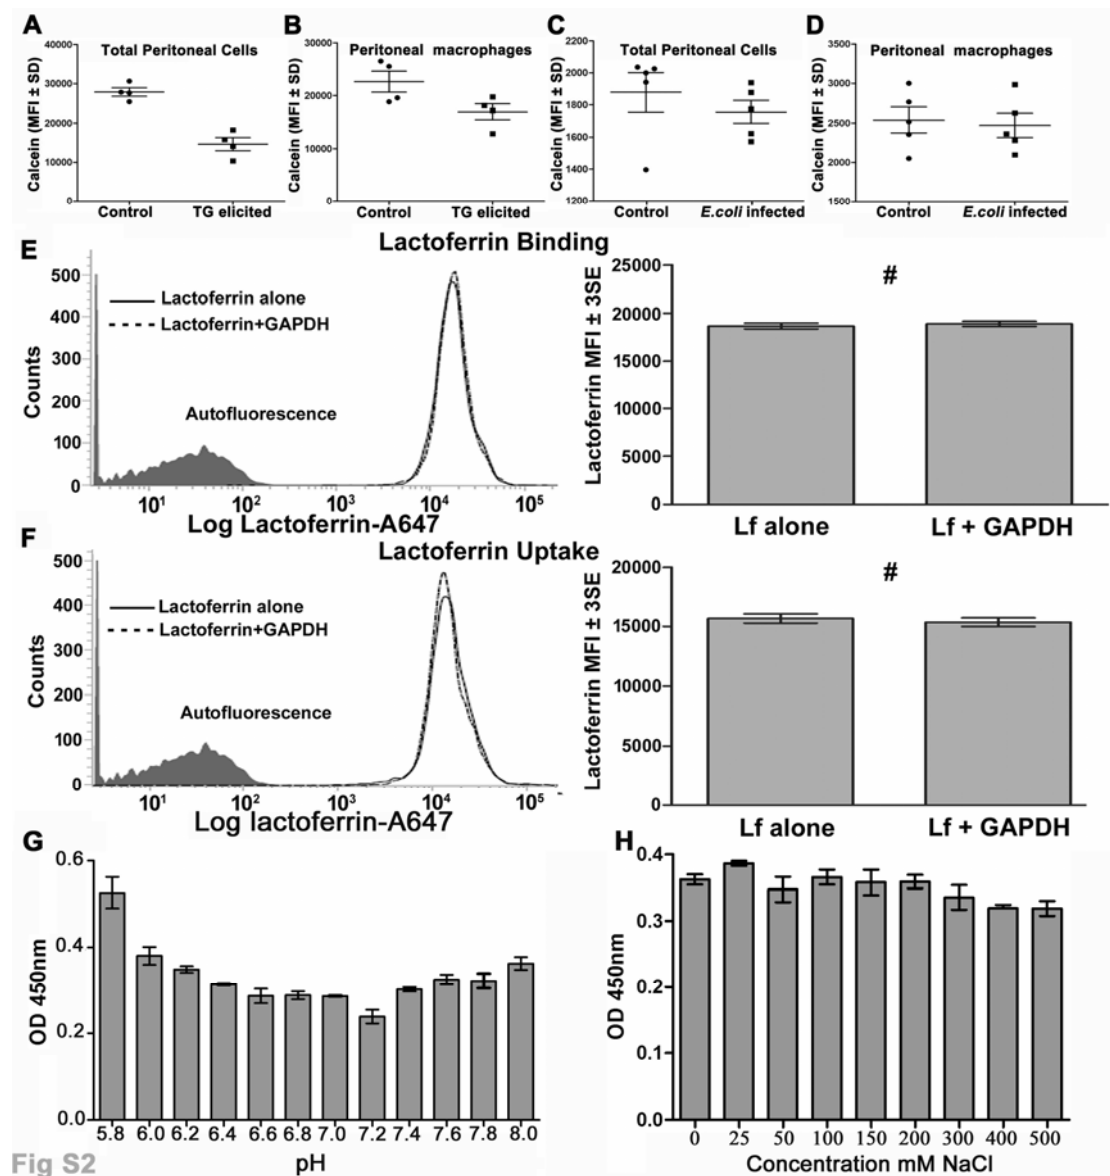

Fig S2

**Supplementary Figure S2. Iron levels in cells isolated from peritonitis induced animals are elevated.** (A - D) Calcein quenching assay reveals that iron levels in peritoneal cells and macrophages isolated from TG elicited peritonitis (A & B) and *E.coli* infected (C & D) mice are elevated. Each group consists of 4 mice. *E.coli* cells are unable to utilize the sGAPDH mediated lactoferrin uptake pathway. (E&F) Bound or internalized Lf was quantified by flow cytometry from  $10^4$  cells incubated with Lf-A647 alone or along with GAPDH. Data is presented as overlay (left) with bar graph of the same experiment presented on right.  $p \geq 0.05$ . (G&H) Lactoferrin capture by GAPDH immobilized in polystyrene wells at different pH and ionic strength. A strong interaction was observed at lower pH (G) while increasing ionic strength did not have any significant effect (H). All experiments were repeated three times and representative graphs are presented.
